# Supplementary material
Source: MDPI journal article supplement (https://www.mdpi.com/2673-7051/1/2/15)
Supplement: s1 [file s1]

**Table 1.** Study variables.

| Variables                              | Question                                                                                                                   | Response options and recoding                                                                                  |
|----------------------------------------|----------------------------------------------------------------------------------------------------------------------------|----------------------------------------------------------------------------------------------------------------|
| <b>Outcome variable</b>                |                                                                                                                            |                                                                                                                |
| Fight                                  | During the past 12 months, how many times were you in a physical fight?                                                    | 1 = 0 times; to 8 = 12 or more times (coded as 1 = No; and 2–8 = Yes)                                          |
| Attacked                               | During the past 12 months, how many times were you physically attacked?                                                    | 1 = 0 days, 2 = 1 or 2 days, 3 = 3 to 5 days, 4 = 6 to 9 days, 5 = 10 or more (coded as 1 = No; and 2–8 = Yes) |
| <b>Explanatory variables</b>           |                                                                                                                            |                                                                                                                |
| Socio-demographic characteristics      |                                                                                                                            |                                                                                                                |
| Age                                    | How old are you?                                                                                                           | 1 = 12, 2 = 13, 3 = 14, 4 = 15, 5 = 16, 6 = 17, 7 = 18 years (coded as 0 = 12–14, 15–19)                       |
| Sex                                    | What is your sex?                                                                                                          | 1 = male, 2 = female (coded 2 = Female, 1 = male)                                                              |
| Grade                                  | In what grade are you?                                                                                                     | 1 = JHS; and 2 = SHS                                                                                           |
| Hunger (proxy of socioeconomic status) | Went hungry past 30 days                                                                                                   | 1 = never, 2 = Rarely, 3 = sometimes, 4 = most of the times, 5 = always (coded 1–3 = No; and 4–5 = Yes)        |
| Psychosocial environmental factors     |                                                                                                                            |                                                                                                                |
| Tobacco use                            | During the past 30 days, on how many days did you use any other form of tobacco, such as chewing tobacco leaves?           | 1 = 0 days; to 7 = All 30 days (coded as 1 = No; and 2–7 = Yes)                                                |
| Alcohol use                            | During the past 30 days, on how many days did you have at least one drink containing alcohol?                              | 1 = 0 days; to 7 = All 30 days (coded as 1 = No; and 2–7 = Yes)                                                |
| Smoking                                | During the past 30 days, how many days did you smoke cigarette?                                                            | 1 = 0 days; to 7 = All 30 days (coded as 1 = No; and 2–7 = Yes)                                                |
| Marijuana use                          | During the past 30 days, how many times have you used marijuana (also called wee, Jah, Indian hemp, ahabammono, and ganja) | 1 = 0 times; to 5 = 20 or more times (coded as 1 = No; and 2–5 = Yes)                                          |
| Anxiety                                | During the past 12 months, how often have you been so worried about something that you could not sleep at night?           | 1 = never to 5 = always (coded 1 – 3 = No; and 4 – 5 = Yes)                                                    |
| Loneliness                             | During the past 12 months, how often have you felt lonely?                                                                 | 1 = never, 2 = rarely, 3 = sometimes, 4 = most of the time to 5 = always (coded as 1–3 = No; and 4–5 = Yes)    |
| Injury                                 | During the past 12 months, how many times were you seriously injured?                                                      | 1 = 0 times; to 8 = 12 or more time (coded as 1 = No; and 2–8 = Yes)                                           |
| Truancy                                | During the past 30 days, on how many days did you miss classes or school without permission?                               | 1 = 0 days, 2 = 1 or 2 days, 3 = 3 to 5 days, 4 = 6 to 9 days, 5 = 10 or more (coded as 1 = No; and 2–5 = Yes) |

|                                                                     |                                                                                                                       |                                                                                                     |
|---------------------------------------------------------------------|-----------------------------------------------------------------------------------------------------------------------|-----------------------------------------------------------------------------------------------------|
| Suicidal ideation                                                   | During the past 12 months, did you ever seriously consider attempting suicide?"                                       | 1=yes, 2=no<br>(coded 2=No; and 1=Yes)                                                              |
| Suicidal attempt                                                    | During the past 12 months, how many times did you actually attempt suicide?                                           | 1=0 times; to 5= 6 or more times (coded as 1=No; and 2-5=Yes)                                       |
| Bullied                                                             | During the past 30 days, how were you bullied most often?                                                             | 1=0 times; to 8 = 12 or more times (coded as 1 = No; and 2-7 = Yes)                                 |
| Close friends                                                       | How many close friends do you have?                                                                                   | 1=0 to 4=3 or more<br>(coded as 1=No; and 2-4=Yes)                                                  |
| Helpful<br>(Peer support)                                           | During the past 30 days, how often were most of the students in your school kind and helpful?                         | 1=never, 2=Rarely, 3=sometimes, 4=most of the times, 5=always<br>(coded as 1-3 = No; and 4-5 = Yes) |
| Parents check homework (parental supervision)                       | During the past 30 days, how often did your parents or guardians check to see if your homework was done?              | 1=never, 2=Rarely, 3=sometimes, 4=most of the times, 5=always<br>(coded as 1-3 = No; and 4-5 = Yes) |
| Understand problems<br>(Parental Connectedness)                     | During the past 30 days, how often did your parents or guardians understand your problems and worries?                | 1=never, 2=Rarely, 3=sometimes, 4=most of the times, 5=always<br>(coded as 1-3 = No; and 4-5 = Yes) |
| Know what adolescent do free time<br>(Parental or guardian Bonding) | During the past 30 days, how often did your parents or guardians really know what you were doing with your free time? | 1=never, 2=Rarely, 3=sometimes, 4=most of the times, 5=always<br>(coded as 1-3=No; and 4-5=Yes)     |
| Parental or guardian respect for Privacy                            | During the past 30 days, how often did your parents or guardians go through your things without your approval?        | 1=never, 2=Rarely, 3=sometimes, 4=most of the times, 5=always<br>(coded as 1-3=No; and 4-5=Yes)     |
